# Supplementary material for: Saffold Virus, a Human Cardiovirus, and Risk of Persistent Islet Autoantibodies in the Longitudinal Birth Cohort Study MIDIA
Source: PubMed Central journal article supplement (PMC4552579; doi:10.1371/journal.pone.0136849), 2015-08-28

## Supplementary Material:

Supplementary Figure S1: Flow diagram depicting the study participants

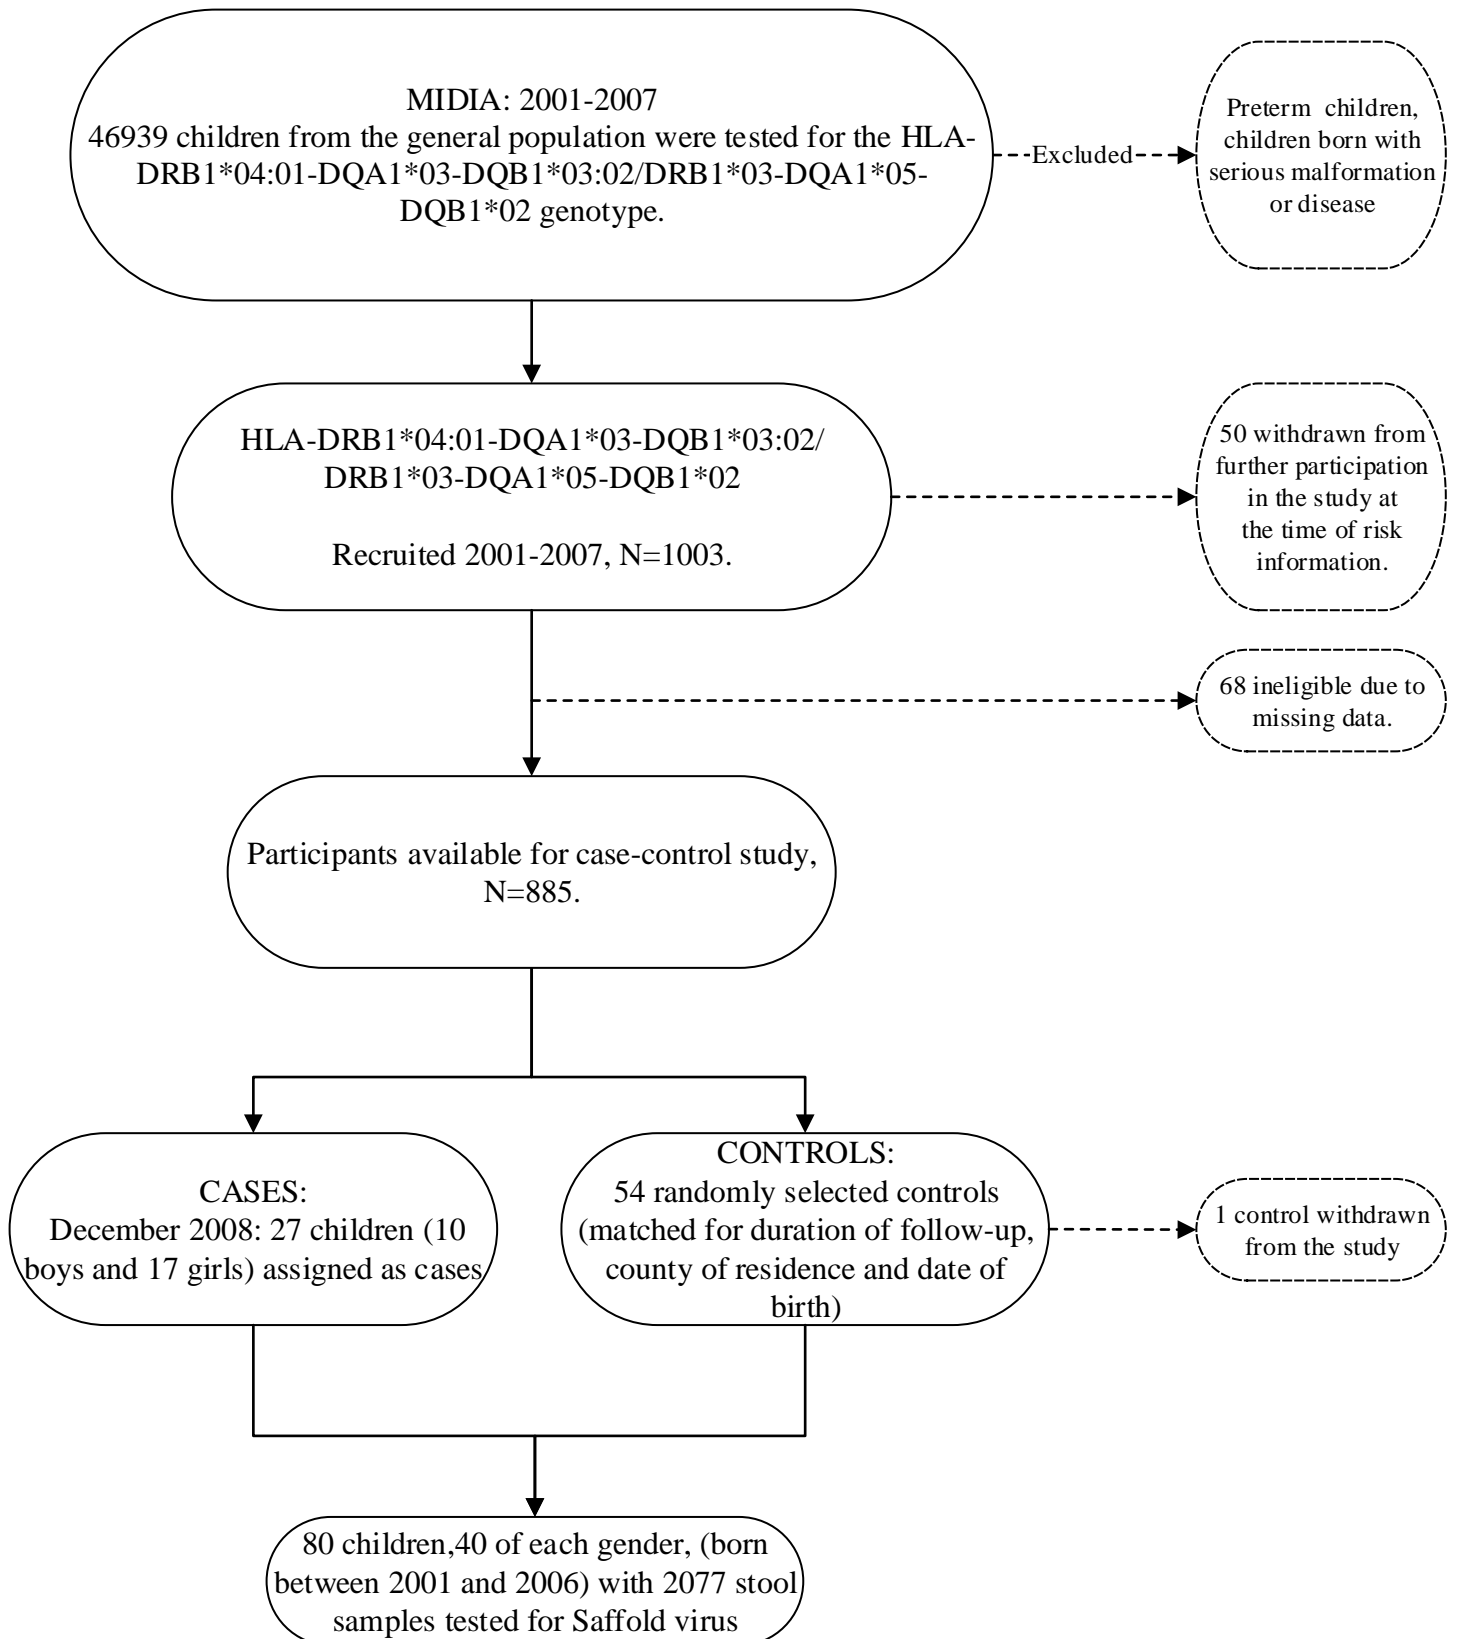

Supplement: pone.0136849.s001.pdf [file pone.0136849.s001.pdf]
